# The Geographical Gap in Leading Medical Journals - a Computational Audit

Oscar Brück<sup>1</sup>

*1 Hematoscope Lab, Helsinki University Hospital, Helsinki, Finland*

## ADDRESS FOR CORRESPONDENCE

Dr. O. Brück, Hematoscope Lab, Helsinki University Hospital, Comprehensive Cancer Center, Haartmaninkatu 8, P.O. Box 700, Helsinki FIN-00290, Finland.

**LENGTH** 2671 words, 3 figures and 1 table

## ABSTRACT

### Background:

Auditing geographical representation in medical publishing could help to mitigate possible national and regional disparities.

### Methods:

Using the Web of Science indexing database, we collected bibliometric data of original research articles published between 2010-2019 in *The New England Journal of Medicine*, *Nature Medicine*, *Journal of the American Medical Association*, *The BMJ*, and *The Lancet*. We studied the corresponding authors' geolocation in regard to publication and citation count, their temporal evolution, and the journals' and citing organizations' nationality.

### Results:

We identified 10,558 articles. Based on the nationality of the corresponding authors' institutes, only 32 countries published more than 10 publications in 10 years equaling to 98.9% of all publications. English-speaking countries USA (48.2%), UK (15.9%), Canada (5.3%), and Australia (3.2%) were most represented, but with a declining trend in recent years. Normalized to their accumulated citations, 9/32 countries were associated with  $\geq 10\%$  publication excess, of which USA (n=1,174 publications) and UK (n=410) accounted for 85.7%. Similar findings were replicated at the municipal level where all top 10 most productive cities were located in USA (n=7), UK (n=2), or Canada (n=1), and 21 out of 25 most productive cities published more articles than predicted based on their accumulated citations. Finally, we discovered that both journals published, and researchers cited more commonly research conducted in the same country.

### Discussion:

NOTE: This preprint reports new research that has not been certified by peer review and should not be used to guide clinical practice.

52 The audit revealed Anglocentric dominance, domestic preference occurring in both  
53 journals and citation selection, and increased geographical representation in recent  
54 years in medical publishing.

## 55 **BACKGROUND**

56 Defined as the yearly-averaged citation frequency of research articles, journal impact  
57 factors (JIF) were initially designed to rank journals by their influence<sup>1</sup>. JIFs have also  
58 been used for non-intended purpose. At the individual level, a successful publication  
59 track record has been interpreted as an ability to conduct high-quality research  
60 permitting both career advancements and increased chances of research funding. At  
61 the institutional level, harboring scientists with publications in journals with high JIF  
62 creates a positive feedback loop, which further attracts human and financial resources  
63 creating polarization among research centers.

64  
65 Monitoring diversity and equity in academic publishing are fundamental to mitigate  
66 possible disparities. By signing the “Joint commitment for action on inclusion and  
67 diversity in publishing” more than 50 publishers representing 15,000 scientific journals  
68 will participate by collecting data on gender and ethnical representation and identify  
69 bias in the editorial and review processes<sup>2</sup>. However, decades of publication metadata  
70 stored in journal indexing databases such as the Web of Science (WoS), Scopus,  
71 PubMed, and Google Scholar could reveal the extent and temporal development of  
72 inequity in medical publishing.

73  
74 In this retrospective cohort study, we examined possible bias related to the  
75 geographical location of the conducted research to the number of publications and  
76 citations. We also interrogated publishing and citing patterns based on the  
77 geographical origin of the conducted research.

78  
79

## 80 **METHODS**

### 81 *Data collection*

82 We selected the five journals publishing mainly original articles and ranked highest in  
83 the Journal Citation Reports 2022 JIF in the field of medicine. These included *New*  
84 *England Journal of Medicine* (NEJM), *Nature Medicine* (NatMed), *Journal of the*  
85 *American Medical Association* (JAMA), *The BMJ*, and *Lancet*. We included all original  
86 articles (n=10,558) published in 2010-2019. More recent publications were not  
87 included due to unequal opportunities of being cited and to avoid bias related to  
88 COVID-19 pandemic. Using the WoS database provided by Clarivate Plc and the query  
89 “(((SO=(NATURE MEDICINE OR LANCET OR NEW ENGLAND JOURNAL OF  
90 MEDICINE OR JAMA JOURNAL OF THE AMERICAN MEDICAL ASSOCIATION OR  
91 BMJ BRITISH MEDICAL JOURNAL)) AND DT=(Article)) AND PY=(2010-2019))”, we  
92 downloaded publication metadata including author names, page length of the article,  
93 address of the corresponding author, and total number of citations. We could also  
94 query international citing patterns based on the digital object identifiers of the 10,558  
95 original articles. National population data were downloaded from the World Bank  
96 database <https://data.worldbank.org/indicator/SP.POP.TOTL>, and municipal data from  
97 the world.cities dataset of the utils R package.

98  
99

### 99 *Preprocessing variables of interest*

100 We defined the impact of an article by its average citation count per year. We text-  
101 mined the number of authors, by calculating the frequency of the semicolon “;” delimiter  
102 between author names and added 1. To geolocate the primary institutes where the  
103 research has been performed, we identified the latitude and longitude coordinates of  
104 the address(es) of the corresponding author(s) with the ggmap library employing

105 Google's Geocoding API. For non-successful matches, we geolocated only the city  
106 and country of the address.

107

### 108 *Indices*

109 We defined the international research impact (IRI) as the relationship between the total  
110 number of publications (10-fold logarithm transformed) and their cumulative citations  
111 (10-fold logarithm transformed) grouped by the research institute of the corresponding  
112 authors. In this study, IRI was used separately when comparing countries and cities.

113

114 We defined the Domestic Self-Citation Index (DSCI) as:

$$115 \frac{\frac{\# \text{ Citations of country } \alpha \text{ from country } \alpha}{\# \text{ Citations in total from country } \alpha}}{\frac{\# \text{ Citations of country } \alpha \text{ from all countries except country } \alpha}{\# \text{ Citations in total of all other except country } \alpha \text{ from country } \alpha}}$$

116 where "# Citations" represents the number of citations and  $\alpha$  any country of interest.

117

### 118 *Statistical analysis*

119 We performed comparisons of two continuous variables with the Wilcoxon rank-sum  
120 test (unpaired, two-tailed) and three or more continuous variables with the Kruskal-  
121 Wallis test. For categorical variables, we used the  $\chi^2$  test. We adjusted p values with  
122 the Benjamini–Hochberg correction. We performed hierarchical clustering with  
123 Euclidean distance metrics and the Ward.d2 method. To compare two linear  
124 regression slopes, we tested the T-test significance of the interaction term. We  
125 conducted statistical analyses and visualizations with R 3.5.1. using base, tidyverse,  
126 fastDummies, maps, reshape2, ggmap, data.table, countrycode, ggpubr, ggrepel,  
127 rstatix, ggdendro and dendextend libraries.

128

129

## 130 **RESULTS**

### 131 *National publication productivity does not imply high citation frequency*

132 Of 10,558 original articles published between 2010-2019 in *NEJM* (n=2,966; 28.1%),  
133 *JAMA* (n=1,833; 17.4%), *NatMed* (n=1,577; 14.9%), *Lancet* (n=2,462; 23.3%), and  
134 *BMJ* (n=1,720; 16.3%), corresponding authors were affiliated to institutes from 77  
135 countries. Each article included 1.2 mean affiliations [range 1-15] equaling to 10,732  
136 total unique entries, of which 100.0% (n=10,730) could be geolocated. When focusing  
137 on countries with  $\geq 10$  original articles in 10 years in any of these five medical journals,  
138 only 32 countries were included representing 98.9% (n=10,613) affiliations highlighting  
139 the geographical exclusivity of medical research.

140

141 Of these, English-speaking countries were overrepresented with almost 3/4 of  
142 publications from the United States of America (USA, 48.2%), the United Kingdom (UK,  
143 15.9%), Canada (5.3%), and Australia (3.2%, Table 1). National population-normalized  
144 publication frequencies correlated with total publication number (corr 0.69 p<0.001,  
145 Spearman test). Following population-normalization, the most represented countries  
146 included Denmark (31.1 articles per million people), UK (25.1), and Switzerland (24.8,  
147 Table 1).

148

149 When examining the international research impact (IRI) by countries, publication count  
150 explained 96.5% of total citations corresponding to an excellent statistical  
151 correspondence (Fig. 1A). However, we also observed unexpected discrepancies. We  
152 identified 19/32 countries with over 10% publication excess or deficit when normalized



153 by their citation frequencies. Based on the relative number of articles, Spain published  
154 78.7% (n=76) and Brazil 62.1% (n=26) fewer and Bangladesh 54.3% (n=6) too many  
155 articles than expected. Based on the absolute number of articles, 1,174 (23.0%) and  
156 410 (24.3%) excess articles were published by corresponding authors affiliated to an  
157 organization located in the USA and UK, respectively. Together, USA and UK  
158 accounted for 85.7% of all articles published in excess (n=1,847).

159  
160 Publications with a corresponding author from Saudi Arabia were associated with  
161 highest median yearly citations (49.4) per publication given their emphasis on the  
162 documentation of the Middle East Respiratory Syndrome (MERS, 7 out of 11 total  
163 publications from Saudi Arabia). However, even without MERS-related articles, the  
164 median yearly citation of publications from Saudi Arabia was the highest 41.8. Other  
165 countries with most elevated median yearly citation per publication included Belgium  
166 (40.2), and China (39.6). Lowest median citations were associated with publications  
167 geolocated in South Asia (Pakistan 11.6, Bangladesh 14.6, India 21.3) and  
168 Scandinavia (Norway 19.7, Denmark 21.2, Sweden 21.3).

169  
170 When extrapolating to continental level, publication exclusivity was even more  
171 pronounced, with 89.5% of all articles originating either from the Americas (53.4%) or  
172 Europe (36.1%, Fig. 1B). However, the 5.2% publications originating from Asian  
173 countries were associated with 15.6% higher citation frequencies compared to median  
174 (27.5) and other continents (Fig. 1B-C).

175  
176 We then studied how the number of publications per country has evolved during the  
177 study time period. By measuring the slope of a fitted linear regression, yearly  
178 publishing productivity in the studied journals decreased steadily in the USA (8.0 fewer  
179 articles per year), UK (5.7), Canada (1.7), and Italy (1.2, Fig. 1D). However, the number  
180 of publications originating from China (2.5) and Israel (0.89) rose, but with a lower  
181 inclination. The IRI patterns varied also temporally (Supplementary Fig. 1). Countries  
182 with numerous publications (USA, UK, Germany, Australia) gradually stepped up their  
183 yearly citation frequencies in line with rising medical journal impact factors. The  
184 average citations decreased for some countries for limited periods (France,  
185 Netherlands, China) before resuming their original increasing inclination.  
186 Heterogenous citation patterns were found in countries with 1-10 yearly publications in  
187 average.

188  
189

190 *Publications from elite research institutes tend to accumulate fewer citations per article*  
191 The international publication selection bias was even more pronounced when studying  
192 the regional location of the corresponding authors' institutes (Fig. 2A). The most  
193 distinct publication hot spots were situated in Northeastern USA, Central Europe, and  
194 the UK with additional dense centers in Southwestern USA and East Asia. On the  
195 contrary, the number of citations per article did not replicate similar geographical  
196 patterns (Fig. 2A). The 10 most represented cities in terms of publication number  
197 covered 36.5% of all publications and were all located in the Anglosphere: USA (n=6),  
198 UK (n=3) and Canada (n=1). The three cities with over 300 publications in 2010-2019  
199 were Boston, USA (n=1,209, 12.2% of all publications), London, UK (n=648, 6.5%)  
200 and New York, USA (n=378, 3.8%).

201  
202 Next, we examined municipal IRIs by including only cities with  $\geq 10$  publications in 10  
203 years retaining 94.0% of the number of publications (n=9,327). Publication number

204 explained 83.6% of the variability in total accumulated citations (Fig. 2B). Multiple  
205 metropolitan cities known for their established research institutes were  
206 overrepresented in terms of publication frequencies. Unexpectedly, 21 out of the 25  
207 most productive cities accumulated less citations than predicted with linear regression  
208 suggesting selection bias. Cities with the highest absolute publication excess included  
209 Boston, USA (n=728 excess articles), London, UK (n=285) and Oxford, UK (n=76). On  
210 the contrary, cities with the highest publication deficit included Seattle, USA (n=76),  
211 Houston, USA (n=27) and Los Angeles, USA (n=6).

212  
213 While the publication count decreased in the USA and UK during the 10-year follow-  
214 up, similar patterns were not as evident when examining the 25 most productive  
215 institutes (Supplementary Fig. 3A). The publishing dynamics varied with some cities  
216 publishing gradually more (New York, Stanford, Philadelphia), some less (London,  
217 Baltimore, Ann Arbor), but for most the direction was inconclusive. As in the national  
218 level, the average yearly citations-per-article increased also at the institute level and  
219 the slope tendency varied more in cities with fewer publications (Supplementary Fig.  
220 3B). Houston stood out with higher citations/publication across follow-up, whereas  
221 publications originating from Boston, Toronto, and Copenhagen accumulated fewer  
222 citations compared to other institutes.

223  
224 The absolute number of publications correlated moderately with population-normalized  
225 publication frequencies (corr 0.41,  $p < 0.001$ ). However, the residuals of the linear  
226 regression model between publication number and citations increased (corr 0.37,  
227  $p < 0.001$ ) by publication number signifying that articles originating from established  
228 research organizations tended to accumulate fewer citations than statistically would be  
229 expected. Finally, institutes from capital cities did not accumulate more citations per  
230 article compared to non-capital cities indicating that the governmental status or  
231 population of the city are poor predictors of IRI (Fig. 2C and Supplementary Fig. 2).

### 232 233 234 *Institute nationality affects both journalistic and citation patterns*

235 Given overlap in the scientific scope of the studied five medical journals, we reasoned  
236 that the geographical coverage of publications should not differ. However, we observed  
237 substantial preponderance of publications from English-speaking countries (UK, New  
238 Zealand and Australia) in both UK-based *BMJ* and *Lancet* journals (Fig. 3A). Moreover,  
239 publications from Scandinavian countries (Norway, Sweden and Denmark),  
240 Netherlands and Canada were overrepresented in *BMJ*. Publications from Germany,  
241 Israel, and Italy were most common in *NatMed*, which is part of the British-German  
242 Springer publishing group. Publications from institutes located in the USA were most  
243 represented in *NatMed* and US-based journals *JAMA* and *NEJM*.

244  
245 To conclude, we audited national citation patterns. First, countries with most  
246 publications were the most active to cite as expected (Fig. 3B, horizontal lines of  
247 recurring balloons). USA was the most common citing country in 30/32 of the most  
248 frequently publishing countries. Articles from China and Singapore were cited more  
249 commonly in publications with a corresponding author based in China.

250  
251 Secondly, countries tended to show domestic preference when citing (Fig. 3B, diagonal  
252 balloons). We observed highest absolute domestic self-citation (#domestic  
253 citations/#all citations) among researchers affiliated to an institute in USA, UK, or South  
254 Africa (Supplementary Fig. 4). To highlight the proportion of self-citations compared to

255 the proportion of citations originating from abroad, we introduce the domestic self-  
256 citation index (DSCI, see Methods). The highest DSCI associated with China, USA,  
257 and Japan, and the lowest with Austria, New Zealand, Kenya, and Greece (Fig. 3C).  
258 National DSCI correlated with their total accumulated citation count (corr 0.70,  
259  $p < 0.001$ ) and publication count (corr 0.46,  $p = 0.015$ ), but not with the absolute count  
260 (corr 0.032,  $p = \text{ns}$ ) nor proportion of excess articles (corr -0.060,  $p = \text{ns}$ ). Domestic self-  
261 citation accounted for 74.5% of total national citation count (corr 0.86,  $p < 0.001$ )  
262 indicating the serious bias related to citation count for evaluating manuscript impact.

263  
264 Lastly, we observed that national citation patterns formed distinct clusters (Fig. 3B,  
265 horizontal colored groups). The largest cluster was composed of the Anglosphere,  
266 European countries, South Korea, and Saudi Arabia. The second largest cluster  
267 included developing countries whereas China, Japan, and Singapore formed the third  
268 cluster. In summary, similar geographical location, development index and health  
269 challenges account for citation trends at the national level.

## 271 272 **DISCUSSION**

273 Available bibliometric data can reveal important information on the equity and  
274 representation in medical research. Longitudinal data permits the study of temporal  
275 trends and can be repurposed for monitoring of diversity. Here, we presented  
276 geographical publication disparity in five leading medical journals based on JIFs  
277 between 2010-2019.

278  
279 We limited the scope of this study to available geographical data recorded in scientific  
280 indexing databases. Therefore, for example ethnical, career-stage, and gender  
281 disparity was not examined. Similarly, the number of submissions and geographical  
282 coverage of reviewers are unavailable, while these could help to further interpret the  
283 results.

284  
285 First, we described the overrepresentation of distinct countries and research  
286 organizations. Almost 3/4 of all publications with a corresponding author originated  
287 from an institute in USA, UK, Canada, or Australia indicating medical publishing is  
288 Anglocentric. Similar findings have been reported both in leading medical journals  
289 between 1971-2005 and in the field of pathology between 2000-2006 suggesting both  
290 an interdisciplinary and long-lasting phenomenon<sup>3,4</sup>. We showed that the number of  
291 articles from institutes in USA, UK and Canada was decreasing, while publications  
292 from China and Israel were more frequent reflecting a gradual transition in international  
293 representation.

294  
295 Second, by comparing IRIs our analysis highlighted an undocumented discrepancy  
296 favoring notably highly productive institutes and countries. For instance, 86% of all  
297 articles published in excess based on their IRI originated from USA or UK. At the  
298 municipal level, 21/25 of the leading centers were found to publish more articles than  
299 expected. In particular, the number of publications with a corresponding author located  
300 in Boston exceeded 60% its predicted quantity.

301  
302 Multiple factors could be involved. For instance, previous studies have indicated a  
303 pronounced correlation between national gross domestic product and publishing in top  
304 medical journals<sup>5,6</sup>. The publication fees require considerable research funding, which  
305 are primarily available in high-income countries making scientific publishing an

306 unintended luxury. Moreover, our data indicated higher proportions of articles from UK,  
307 Australia, Canada and New Zealand in UK-based journals (*BMJ* and *Lancet*), while  
308 corresponding authors from USA were overrepresented in American journals (*JAMA*  
309 and *NEJM*). UK-affiliated research published in UK-based journals (*BMJ*, 28.1%;  
310 *Lancet*, 34.8%; mean 30.8%) was almost 5-fold compared to the average proportion  
311 in *NEJM*, *NatMed* and *JAMA* (6.3%). Importantly, journals such as *Lancet* advice  
312 authors to consider diversity when inviting coauthors<sup>7</sup>. Yet, further comparative studies  
313 on submission rates are required to better understand the reasons and to exclude  
314 domestic preference at review or editorial level, which could undermine public trust in  
315 scientific publishing and possibly found new journals from underrepresented countries.  
316 Importantly, our data indicated that less-publishing countries and institutes tended to  
317 accumulate higher citations, which could reflect both interest and ultimately elevate  
318 further JIFs. Diversity and inclusion of developing countries would benefit the scientific  
319 community as demonstrated during the SARS, MERS, and COVID-19 epidemics,  
320 facilitate the adoption of health policies globally, and diversify medical research by  
321 increasing international collaborations<sup>8</sup>.

322  
323 When examining international citation patterns, we identified considerable domestic  
324 preference. The nationality of the research institute accounted for 74.5% of the  
325 international citation variance. In addition, the DSCI varied 8-fold between the studied  
326 countries emphasizing that further research in citation patterns is needed. The results  
327 are in line with a study reporting that 85% of the variability of the scientific journalism  
328 coverage of 22 newspapers focused on domestic research<sup>9</sup>. However, we also  
329 observed international citing clusters reflecting likely similar research interests and  
330 collaborations.

331  
332 In summary, this computational audit of author affiliations in top medical journals  
333 revealed the Anglocentric dominance embodied as publication excess in relation to  
334 their accumulated citation and domestic preference by journals. Based on longitudinal  
335 data, the international representation gap in top medical journals is gradually  
336 decreasing.

337 **ADDITIONAL INFORMATION**

338

339 **ACKNOWLEDGMENTS**

340 The author wishes to thank Susanna Lallukka-Brück for her patience, understanding,  
341 and insightful comments. The author is grateful for Olli Dufva and to the members of  
342 the Hematoscope Lab for discussion and comments. Certain data included herein are  
343 derived from Clarivate Web of Science. © Copyright Clarivate 2022. All rights reserved.

344

345 **AUTHORS' CONTRIBUTIONS**

346 Conception and design; Collection and assembly of data; Data analysis; Manuscript  
347 writing; Manuscript editing; Data interpretation; Final approval of manuscript: O.B.

348

349 **ETHICS APPROVAL AND CONSENT TO PARTICIPATE**

350 The study complied with the Declaration of Helsinki.

351

352 **CODE AND DATA AVAILABILITY**

353 Codes and a 100-row data example are available at  
354 <https://github.com/obruck/International-Research-Impact>. Raw data can be  
355 downloaded from Clarivate Web of Science, with instructions provided in the Github  
356 repository.

357

358 **COMPETING INTERESTS**

359 O.B. declares no Competing Non-Financial Interests but the following Competing  
360 Financial Interests: consultancy fees from Novartis, Sanofi, and Amgen, outside the  
361 submitted work.

362

363 **FUNDING INFORMATION**

364 This study was supported by research grants from the Helsinki University Hospital.

365



366 **REFERENCES**

- 367 1 Garfield E. The History and Meaning of the Journal Impact Factor. *JAMA* 2006;  
368 **295**: 90–3.
- 369 2 Else H, Perkel JM. The giant plan to track diversity in research journals. *Nature*  
370 2022; **602**: 566–70.
- 371 3 Fritzsche FR, Oelrich B, Dietel M, Jung K, Kristiansen G. European and US  
372 publications in the 50 highest ranking pathology journals from 2000 to 2006. *J*  
373 *Clin Pathol* 2008; **61**: 474 LP – 481.
- 374 4 Falagas ME, Alexiou VG. An analysis of trends in globalisation of origin of  
375 research published in major general medical journals. *Int J Clin Pract* 2008; **62**:  
376 71–5.
- 377 5 Halpenny D, Burke J, McNeill G, Snow A, Torreggiani WC. Geographic Origin  
378 of Publications in Radiological Journals as a Function of GDP and Percentage  
379 of GDP Spent on Research. *Acad Radiol* 2010; **17**: 768–71.
- 380 6 Man JP, Weinkauff JG, Tsang M, Sin JHDD. Why do Some Countries Publish  
381 More Than Others? An International Comparison of Research Funding, English  
382 Proficiency and Publication Output in Highly Ranked General Medical Journals.  
383 *Eur J Epidemiol* 2004; **19**: 811–7.
- 384 7 The Lancet Information for Authors.  
385 <https://www.thelancet.com/pb/assets/raw/Lancet/authors/tl-info-for-authors.pdf>.  
386 2022.
- 387 8 Ghani M, Hurrell R, Verceles AC, McCurdy MT, Papali A. Geographic, Subject,  
388 and Authorship Trends among LMIC-based Scientific Publications in High-  
389 impact Global Health and General Medicine Journals: A 30-Month Bibliometric  
390 Analysis. *J Epidemiol Glob Health* 2020; **11**: 92–7.
- 391 9 Casino G, Rius R, Cobo E. National citation patterns of NEJM, The Lancet,  
392 JAMA and The BMJ in the lay press: a quantitative content analysis. *BMJ Open*  
393 2017; **7**: e018705.
- 394  
395

396 **TABLES**

397 Table 1. Publication metrics by country.

| Country      | # Citations | # Citations/<br>Year | # Articles | # Population | # Citations/<br>Article/<br>Population/<br>Year | # Articles/<br>Population | # Excess<br>Articles | % Excess<br>Articles |
|--------------|-------------|----------------------|------------|--------------|-------------------------------------------------|---------------------------|----------------------|----------------------|
| Australia    | 20443.2     | 28.9                 | 339        | 25.7         | 1.1                                             | 13.2                      | -22.1                | -6.5                 |
| Austria      | 1594.3      | 29.8                 | 36         | 9.0          | 3.3                                             | 4.0                       | -1.9                 | -5.2                 |
| Bangladesh   | 162.4       | 14.6                 | 11         | 166.3        | 0.1                                             | 0.1                       | 6.0                  | 54.3                 |
| Belgium      | 5111.6      | 40.2                 | 82         | 11.6         | 3.5                                             | 7.1                       | -24.1                | -29.4                |
| Brazil       | 3094.9      | 37.1                 | 42         | 214.0        | 0.2                                             | 0.2                       | -26.1                | -62.1                |
| Canada       | 30632.0     | 28.4                 | 560        | 38.2         | 0.7                                             | 14.6                      | 43.8                 | 7.8                  |
| China        | 15919.5     | 39.6                 | 225        | 1412.4       | 0.0                                             | 0.2                       | -64.5                | -28.7                |
| Denmark      | 6633.5      | 21.2                 | 182        | 5.9          | 3.6                                             | 31.1                      | 48.5                 | 26.6                 |
| Finland      | 1679.8      | 26.1                 | 40         | 5.5          | 4.7                                             | 7.2                       | 0.3                  | 0.8                  |
| France       | 24133.5     | 33.7                 | 386        | 67.5         | 0.5                                             | 5.7                       | -32.1                | -8.3                 |
| Germany      | 21318.0     | 36.0                 | 376        | 83.1         | 0.4                                             | 4.5                       | 1.3                  | 0.3                  |
| Greece       | 733.3       | 31.9                 | 14         | 10.7         | 3.0                                             | 1.3                       | -5.1                 | -36.2                |
| India        | 1278.1      | 21.3                 | 34         | 1393.4       | 0.0                                             | 0.0                       | 2.8                  | 8.4                  |
| Ireland      | 722.1       | 29.5                 | 17         | 5.0          | 5.9                                             | 3.4                       | -1.8                 | -10.7                |
| Israel       | 2047.4      | 22.0                 | 47         | 9.4          | 2.3                                             | 5.0                       | -0.3                 | -0.5                 |
| Italy        | 6699.9      | 35.3                 | 133        | 59.1         | 0.6                                             | 2.3                       | -1.7                 | -1.3                 |
| Japan        | 5982.8      | 26.9                 | 112        | 125.7        | 0.2                                             | 0.9                       | -9.9                 | -8.8                 |
| Kenya        | 453.4       | 23.7                 | 17         | 55.0         | 0.4                                             | 0.3                       | 4.5                  | 26.7                 |
| Netherlands  | 17730.4     | 25.9                 | 374        | 17.5         | 1.5                                             | 21.3                      | 55.6                 | 14.9                 |
| New Zealand  | 2240.5      | 27.8                 | 53         | 5.1          | 5.4                                             | 10.3                      | 1.8                  | 3.4                  |
| Norway       | 1935.5      | 19.6                 | 62         | 5.4          | 3.6                                             | 11.5                      | 17.0                 | 27.5                 |
| Pakistan     | 377.4       | 11.6                 | 13         | 225.2        | 0.1                                             | 0.1                       | 2.4                  | 18.5                 |
| Saudi Arabia | 638.4       | 49.4                 | 12         | 35.3         | 1.4                                             | 0.3                       | -4.9                 | -40.6                |
| Singapore    | 1173.0      | 23.2                 | 23         | 5.5          | 4.3                                             | 4.2                       | -5.9                 | -25.6                |
| South Africa | 2368.6      | 25.5                 | 58         | 60.0         | 0.4                                             | 1.0                       | 4.3                  | 7.3                  |
| South Korea  | 1656.9      | 39.1                 | 34         | 51.7         | 0.8                                             | 0.7                       | -5.2                 | -15.3                |
| Spain        | 8909.0      | 39.6                 | 97         | 47.3         | 0.8                                             | 2.0                       | -76.3                | -78.7                |
| Sweden       | 7303.3      | 21.2                 | 199        | 10.4         | 2.0                                             | 19.1                      | 53.6                 | 26.9                 |
| Switzerland  | 10218.5     | 29.9                 | 216        | 8.7          | 3.4                                             | 24.8                      | 20.4                 | 9.4                  |
| Thailand     | 946.8       | 26.7                 | 17         | 70.0         | 0.4                                             | 0.2                       | -6.9                 | -40.6                |
| UK           | 85627.5     | 24.4                 | 1691       | 67.3         | 0.4                                             | 25.1                      | 410.5                | 24.3                 |
| USA          | 305130.0    | 28.0                 | 5111       | 331.9        | 0.1                                             | 15.4                      | 1174.5               | 23.0                 |

398



399 **FIGURE LEGENDS**

400 **Figure 1. Medical publishing at the national level.** (A) Linear regression of the  
401 number of citations (LOG10-transformed) and publications (LOG10-transformed) of  
402 the top 32 most productive countries. The percentage and font color indicate the  
403 proportion of excess (positive number and red font) or deficient (negative number and  
404 blue font) publications compared to the predicted number based on the  
405 citation/publication count. (B) Bar plots illustrating the number of publications and (C)  
406 citations per publication by continent. (D) Line plot illustrating the number of  
407 publications by their publishing year from the top 32 most productive countries.

408  
409 **Figure 2. Medical publishing at the municipal level.** (A) A world map with density  
410 contours indicating hot spots based on the number of publications. Blue-colored points  
411 reflect the average number of citations in that area. (B) Linear regression of the number  
412 of citations (LOG10-transformed) and publications (LOG10-transformed) by cities. The  
413 percentage and font color indicate the proportion of excess (positive number and  
414 country name in red) or deficient number of publications compared to the predicted  
415 number based on the citation/publication count. Country name abbreviations are  
416 added for city names, which are found in more than one country. (C) Box plot of the  
417 number of citations per publication in capital vs. non-capital cities (Paired Wilcoxon  
418 test).

419  
420 **Figure 3. National journal and citation fingerprints.** (A) Bar plot illustrating the  
421 proportion of publications in medical journals originating from different countries. Only  
422 significant results of the Kruskal-Wallis analysis are plotted. (B) Balloon plot illustrating  
423 the international citation patterns of articles published in leading medical journals. The  
424 balloon size reflects the proportion which countries have cited the most any given  
425 country (column-wise). The balloon color reflects the absolute number of citations any  
426 given country has received. Citing countries have been grouped by hierarchical  
427 clustering (Euclidean distance). (C) Bar plot illustrating the same data as in the  
428 previous plot but proportioned to how much other countries have cited any given  
429 country in relation to how much they have cited all others countries. See Methods for  
430 the definition of the Domestic Self-Citation Index.

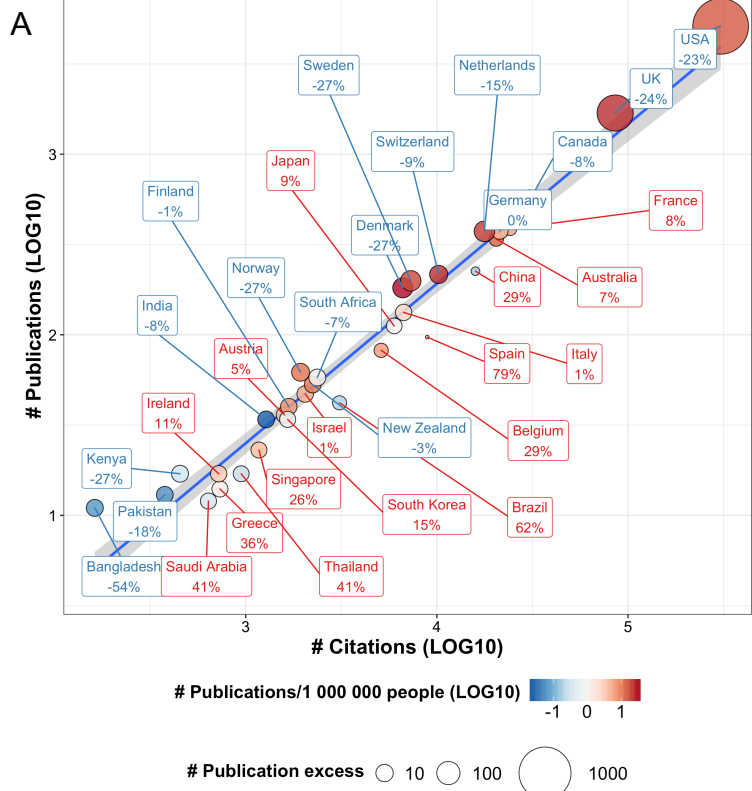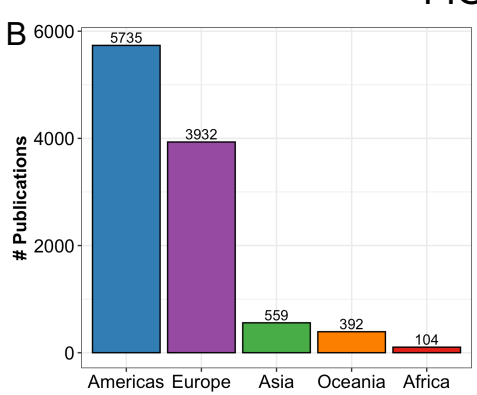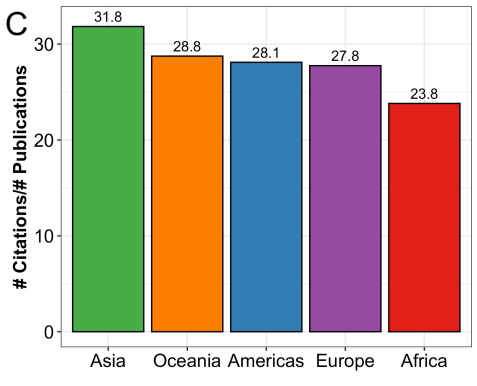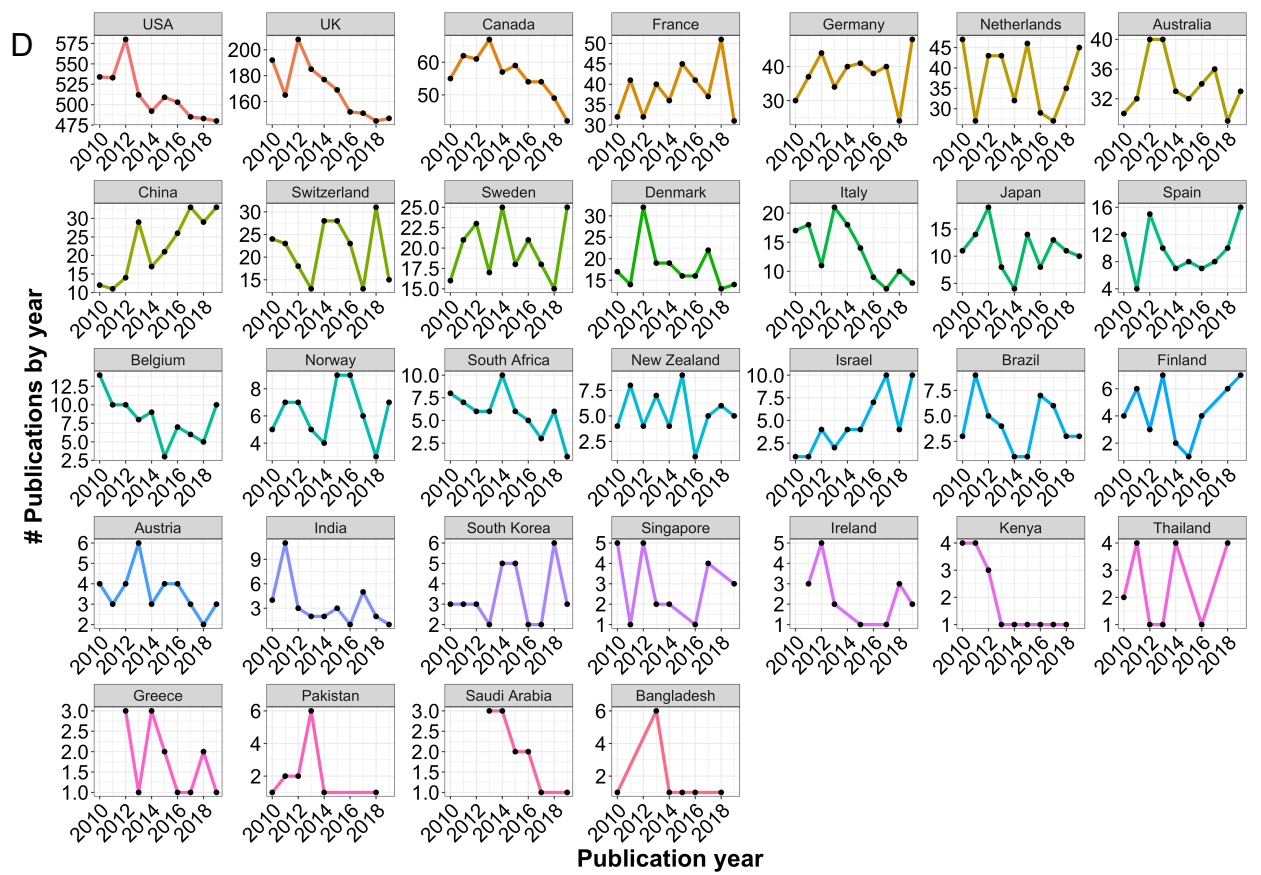

A

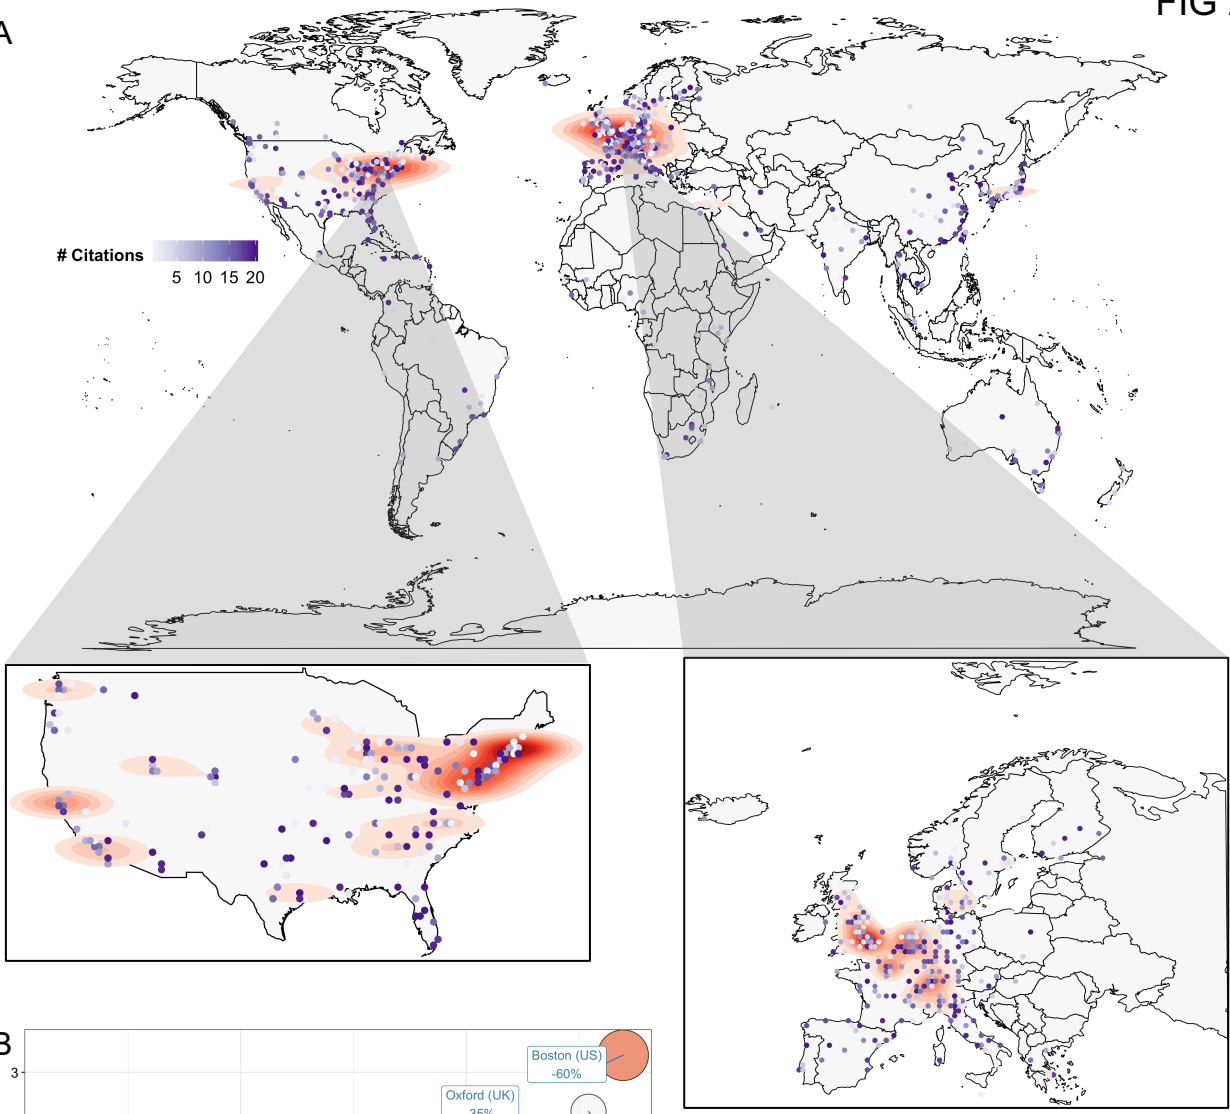

B

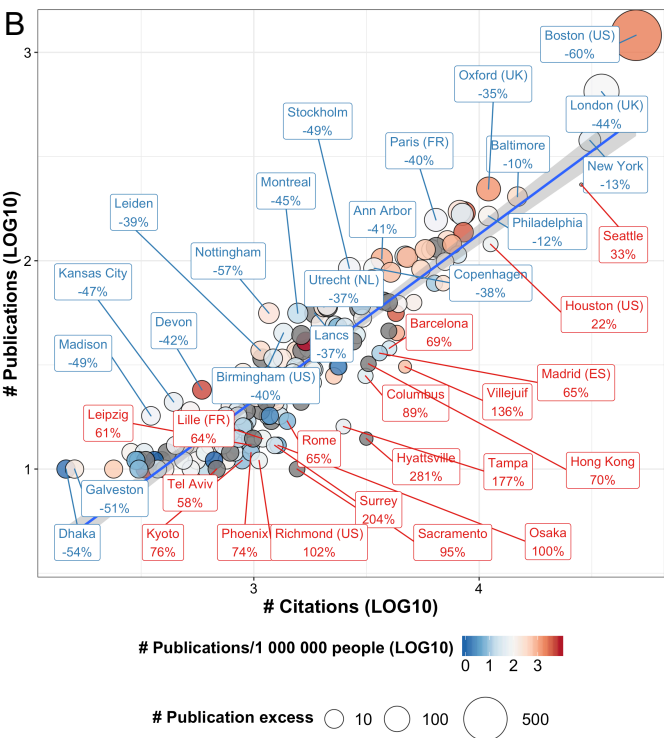

C

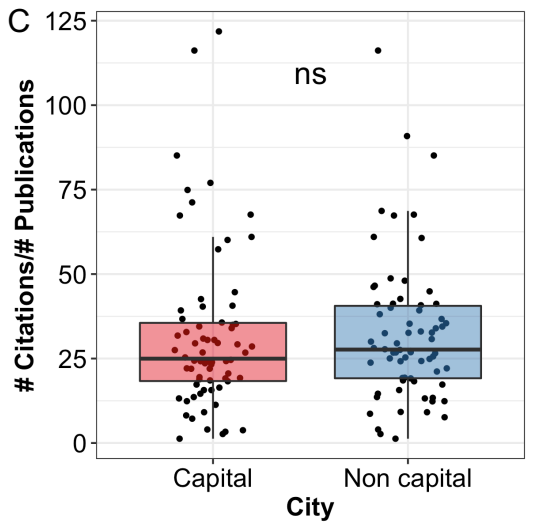

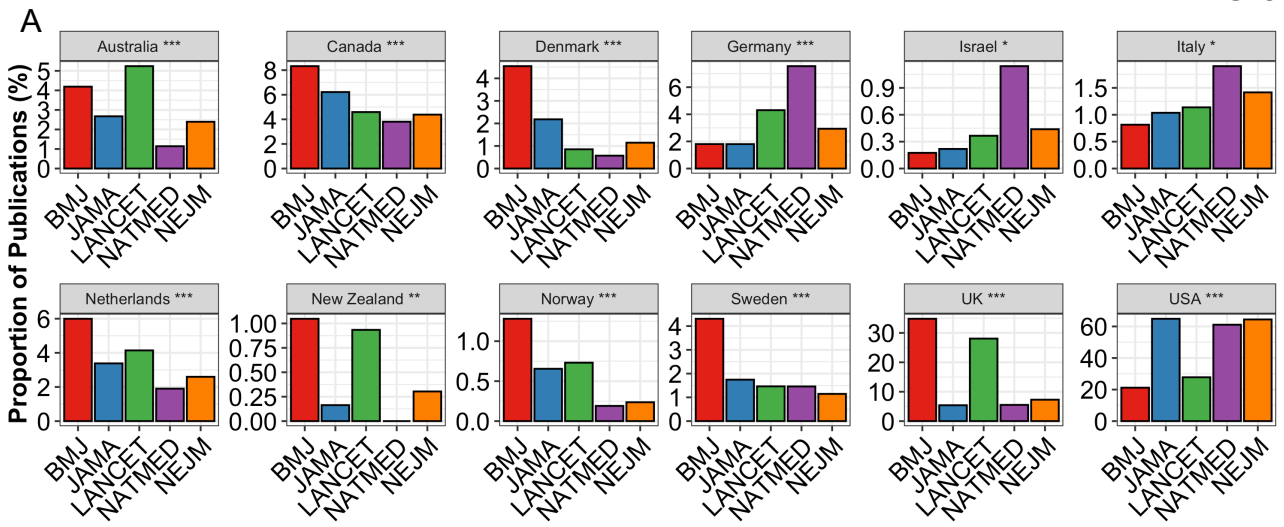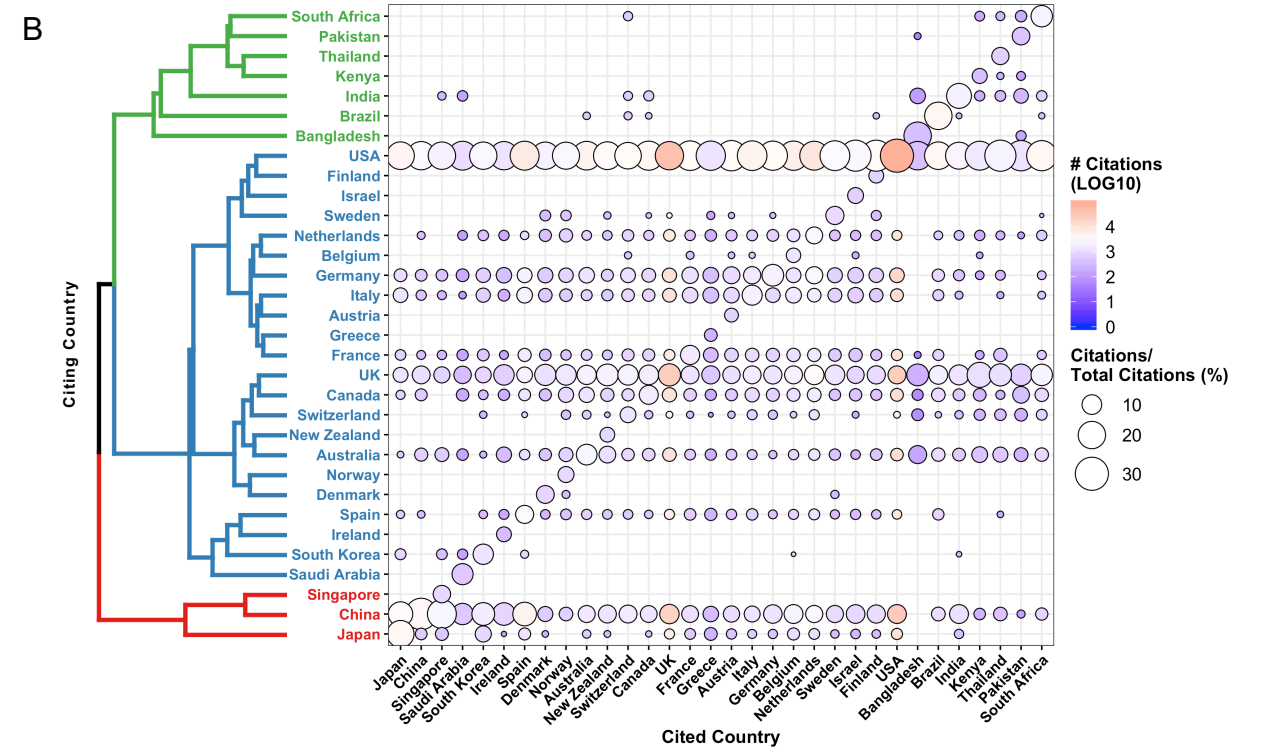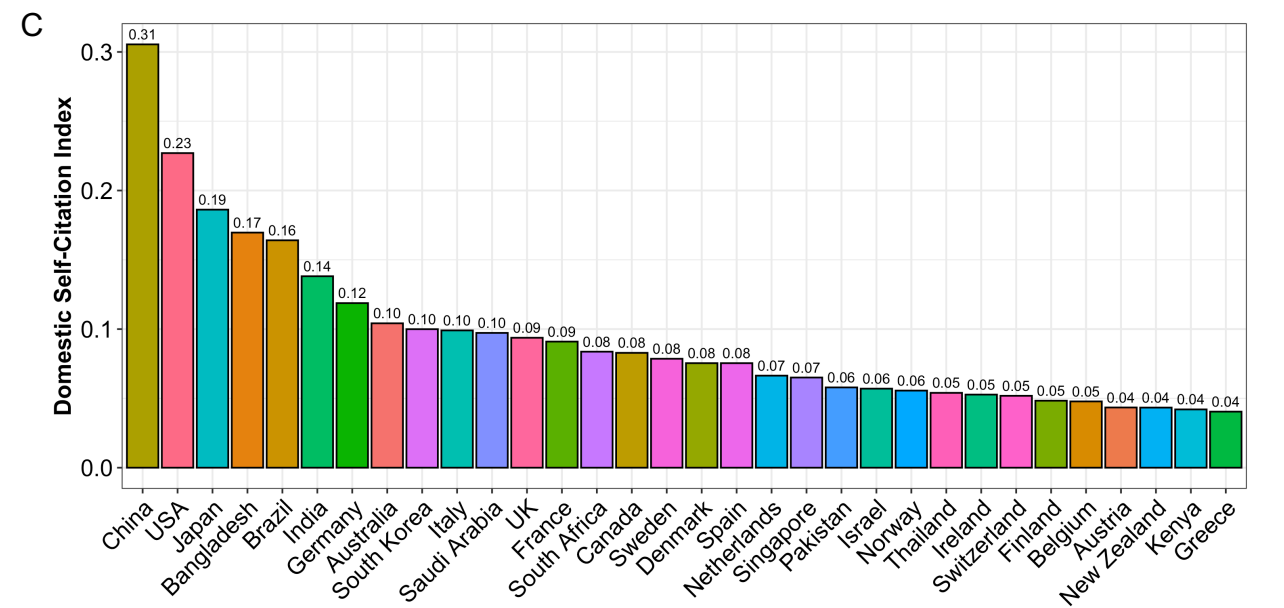

Source: https://medrxiv.org/content/10.1101/2022.12.12.22283368v1.full.pdf
